# Supplementary material for: The Serum Metabolite Response to Diet Intervention with Probiotic Acidified Milk in Irritable Bowel Syndrome Patients Is Indistinguishable from that of Non-Probiotic Acidified Milk by 1H NMR-Based Metabonomic Analysis
Source: Nutrients. 2010 Nov 23;2(11):1141–55. doi: 10.3390/nu2111141 (PMC3257620; doi:10.3390/nu2111141)

## Supplemental material

Supplementary Table 1: Participant baseline characteristics (age, BMI, gender, time with and type of IBS) by treatment group. Supplementary Table 2: Composition of the acidified milk products. Supplementary Figure 1: PCA scoreplots of baseline and post treatment samples from both GDL treatment group. Supplementary Figure 2: PCA scoreplots of baseline and post treatment samples from probiotic milk treatment group. Supplementary Figure 3: OPLS-DA scoreplots of GDL and probiotic milk treatment groups.

**Supplemental material – Pedersen *et al.*** - The Serum Metabolite Response to Diet Intervention with Probiotic Acidified Milk in Irritable Bowel Syndrome Patients is indistinguishable from that of Non-Probiotic Acidified Milk by <sup>1</sup>H NMR-Based Metabonomic Analysis.

**Supplemental Table 1.** Participant characteristics by treatment group <sup>a</sup>.

| Participant characteristic                      | GDL <sup>b</sup> |       | Probiotic <sup>c</sup> |       |
|-------------------------------------------------|------------------|-------|------------------------|-------|
| Age, y                                          | 45.70            | ±2.97 | 40.70                  | ±2.91 |
| BMI, kg/m <sup>2</sup>                          | 24.02            | ±0.62 | 24.13                  | ±0.63 |
| Gender, %                                       |                  |       |                        |       |
| <i>Female</i>                                   | 73               |       | 69                     |       |
| <i>Male</i>                                     | 27               |       | 31                     |       |
| Type of IBS, %                                  |                  |       |                        |       |
| <i>Diarrhoea</i>                                | 48               |       | 40                     |       |
| <i>Constipation</i>                             | 28               |       | 20                     |       |
| <i>Constipation/Diarrhea</i>                    | 21               |       | 33                     |       |
| <i>No constipation or diarrhea</i> <sup>d</sup> | 3                |       | 7                      |       |
| Time with IBS, %                                |                  |       |                        |       |
| <i>Less than 5 y</i>                            | 10               |       | 17                     |       |
| <i>More than 5 y</i>                            | 90               |       | 83                     |       |

<sup>a</sup> Age and BMI are given as means ± SEM. Gender, type of IBS and time with IBS are given as percentage of group. *P*(age) > 0.05 and *P*(BMI) > 0.05; <sup>b</sup> *n* = 30; <sup>c</sup> *n* = 31; <sup>d</sup> Constipation or diarrhea for this subgroup of patients was not recorded during the study period.

**Supplemental Table 2.** Composition of probiotic milk product and GDL milk product.

| Product                      | Probiotics-containing milk product                                                                                 | Acidified milk product           |
|------------------------------|--------------------------------------------------------------------------------------------------------------------|----------------------------------|
| Proximate composition (g/kg) |                                                                                                                    |                                  |
| Protein                      | 40                                                                                                                 | 40                               |
| Fat                          | 15                                                                                                                 | 15                               |
| Carbohydrate                 | 40                                                                                                                 | 65 <sup>a</sup>                  |
| Lactose                      | 35                                                                                                                 | 45                               |
| Ingredients                  | Milk                                                                                                               | Milk                             |
| Acidifiers <sup>b</sup>      | <i>Lactobacillus delbruckeii</i> ssps.<br><i>bulgaricus</i><br><i>Streptococcus thermophilus</i>                   | D-(+)-gluconic acid<br>δ-lactone |
| Probiotics <sup>c</sup>      | <i>Lactobacillus paracasei</i> F19<br><i>Lactobacillus acidophilus</i> LA-5<br><i>Bifidobacterium lactis</i> BB-12 |                                  |

<sup>a</sup> Acidifier D-(+)-gluconic acid δ-lactone incorporated in the noted value; <sup>b</sup> Final concentration of biological fermenters in the product:  $10^7 - 10^9$  CFU/g; <sup>c</sup> Final concentration of each probiotic strain in the product:  $5 \times 10^7$  CFU/g.

**Supplemental Figure 1.** PCA scoreplot of blood serum baseline samples collected from the GDL and the probiotic milk product treated patient groups before the intervention period. (A) GDL milk treated patient group ( $n = 29$ ).  $R^2X(1)^a = 0.589$ ,  $R^2X(2) = 0.149$  and  $Q^2(\text{cum}) = 0.819$ . (B) Probiotic milk treated patient group ( $n = 30$ ).  $R^2X(1) = 0.611$ ,  $R^2X(2) = 0.197$  and  $Q^2(\text{cum}) = 0.928$ .

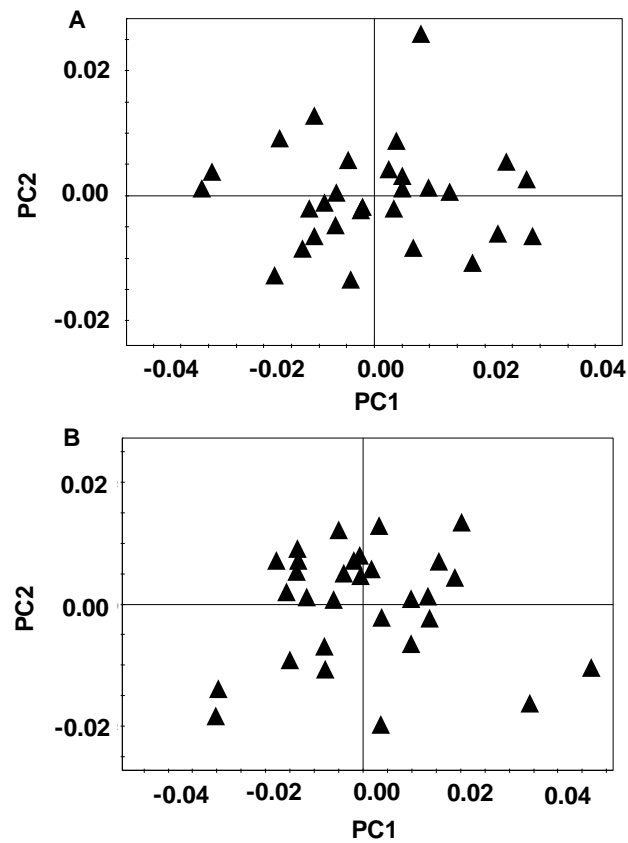

**Supplemental Figure 2.** PCA scoreplot of blood serum post treatment samples collected from the GDL and the probiotic milk product treated patient groups after an 8 wk intervention period. (A) GDL milk product treated patients ( $n = 29$ ).  $R^2X(1) = 0.592$ ,  $R^2X(2) = 0.183$  and  $Q^2(\text{cum}) = 0.923$ . (B) Probiotic milk treated patient group ( $n = 30$ ).  $R^2X(1) = 0.638$ ,  $R^2X(2) = 0.171$  and  $Q^2(\text{cum}) = 0.925$ .

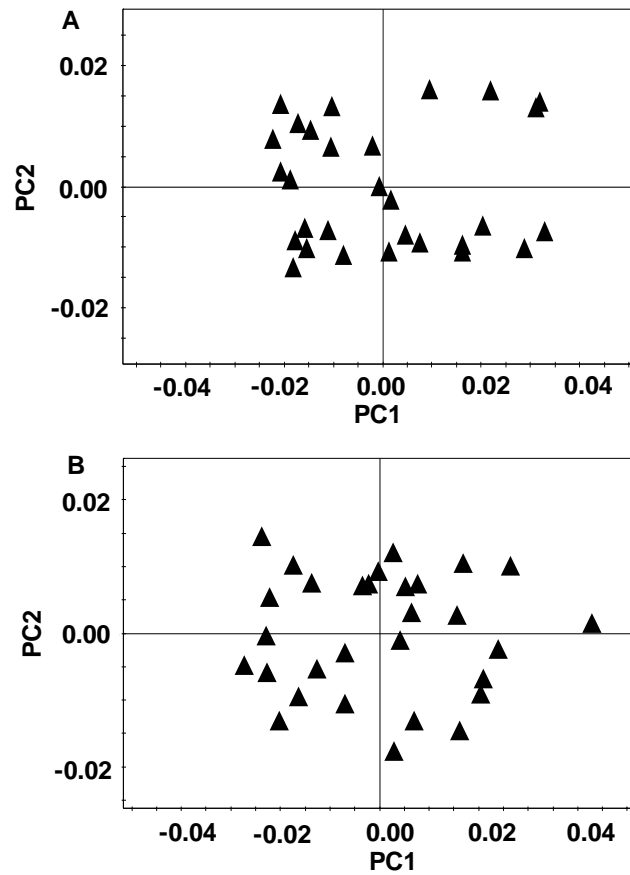

**Supplemental Figure 3.** OPLS-DA score plots of GDL and probiotic milk product treated patient blood serum samples. (A) OPLS-DA scoreplot of GDL milk patient group baseline and post treatment samples ( $n = 58$ ).  $R^2X(\text{cum}) = 0.821$  and  $Q^2(\text{cum}) = 0.841$ . (B) OPLS-DA scoreplot of probiotic milk patient group baseline and post treatment samples ( $n = 60$ ).  $R^2X(\text{cum}) = 0.833$  and  $Q^2(\text{cum}) = 0.848$ .

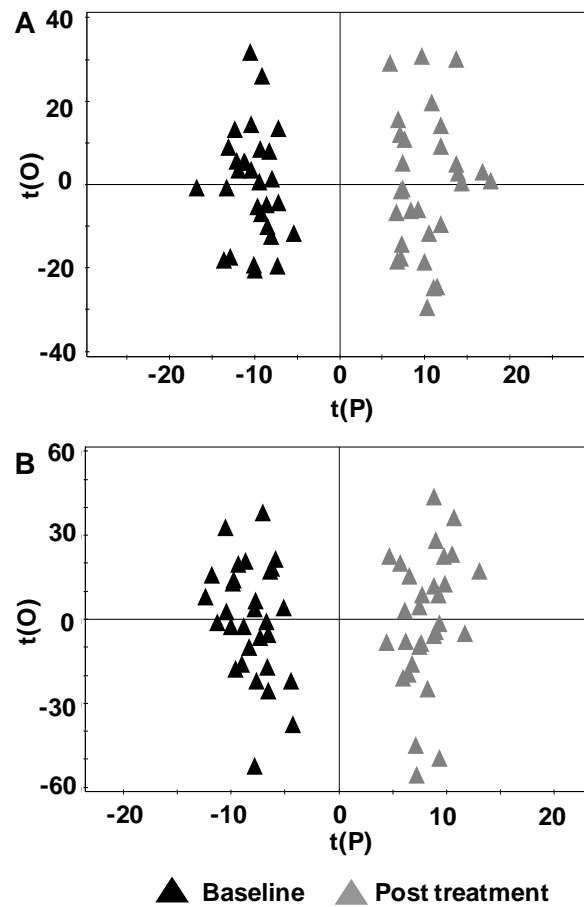

Supplement: Supplementary File 1: — Supplementary Material.pdf(PDF, 111KB) [file nutrients-02-01141-s001.pdf]
